# Supplementary figures and images for: Notch signalling stabilises boundary formation at the midbrain-hindbrain organiser
Source: Oxford University Press journal article supplement (doi:10.1242/dev.070318), 2011-07-28

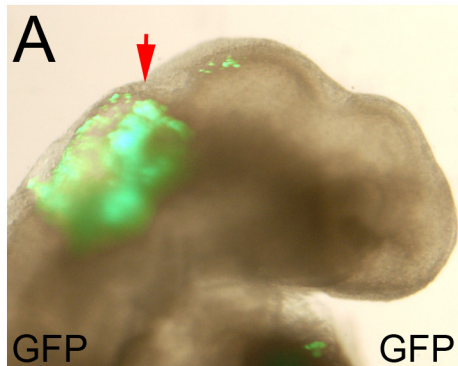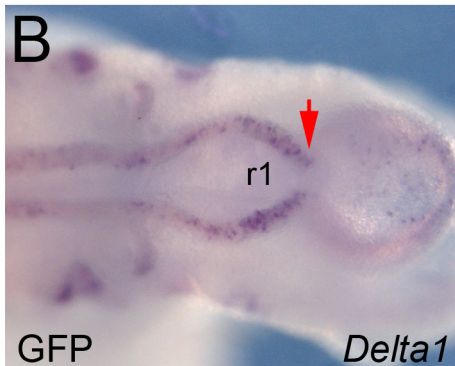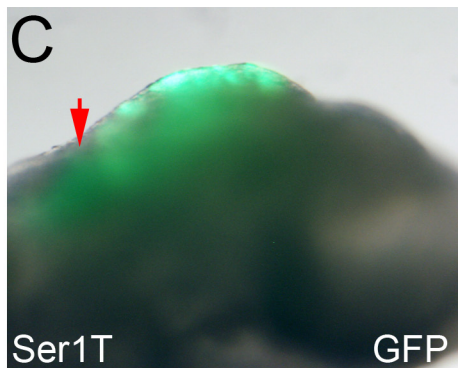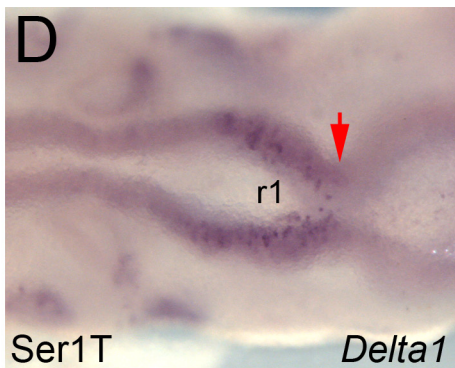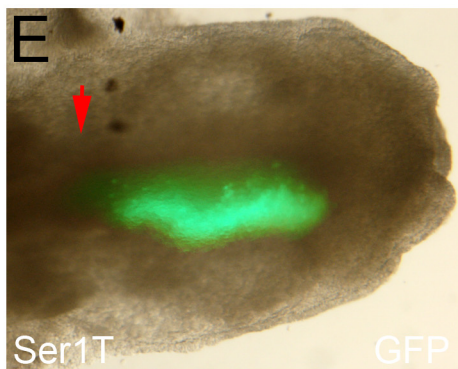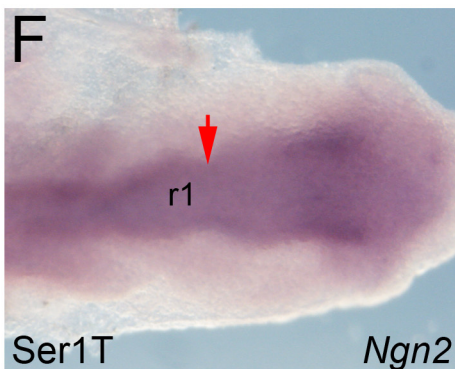

Supplement: dev070318figs1.pdf [file dev070318figs1.pdf]

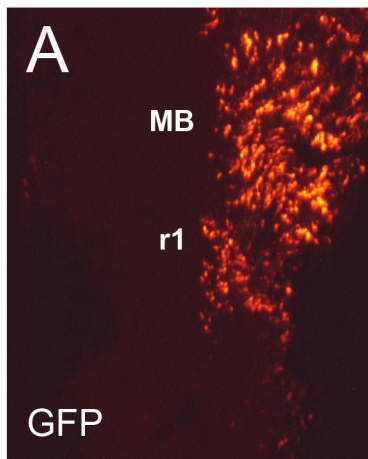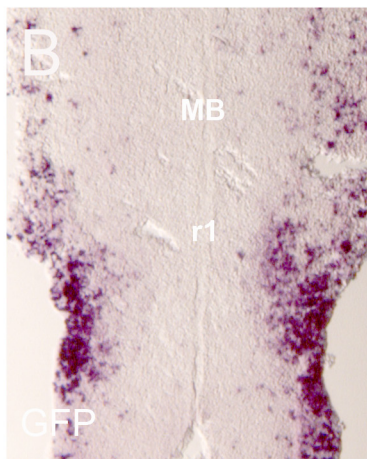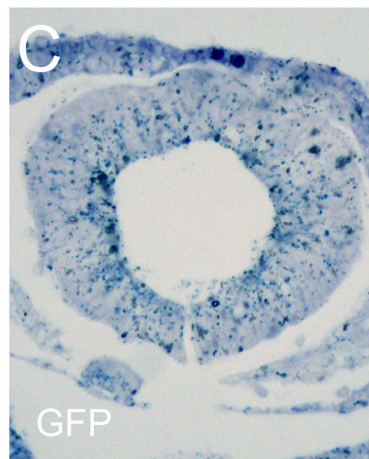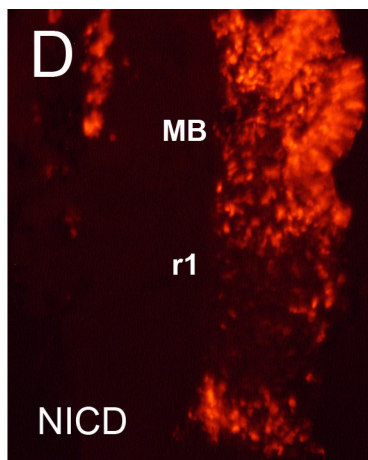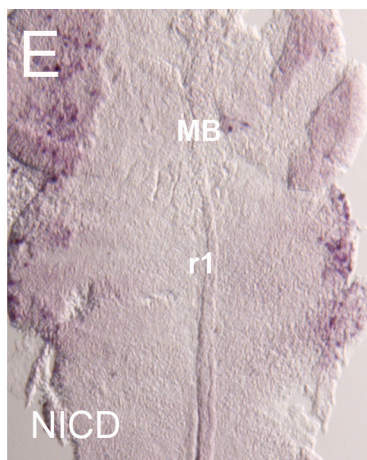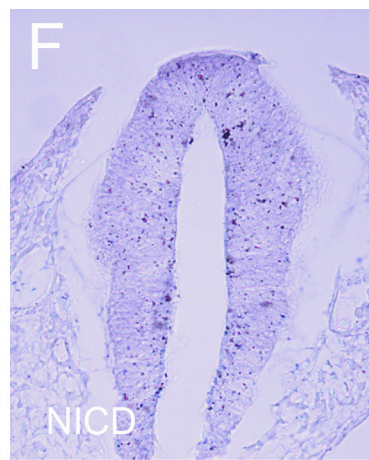

Supplement: dev070318figs2.pdf [file dev070318figs2.pdf]
